## Targeting the multifaceted BRAF in cancer: New directions

Eamon Toye<sup>1,2,3</sup>, Alexander Chehrazi-Raffle<sup>4</sup>, Justin Hwang<sup>1,2</sup> and Emmanuel S. Antonarakis<sup>1,2</sup>

<sup>1</sup>Masonic Cancer Center, University of Minnesota-Twin Cities, Minneapolis, MN 55455, USA

<sup>2</sup>Department of Medicine, University of Minnesota-Twin Cities, Minneapolis, MN 55455, USA

<sup>3</sup>Perelman School of Medicine, University of Pennsylvania, Philadelphia, PA 19146, USA

<sup>4</sup>City of Hope Comprehensive Cancer Center, Duarte, CA 91010, USA

**Correspondence to:** Emmanuel S. Antonarakis, **email:** anton401@umn.edu  
Justin Hwang, **email:** jhwang@umn.edu

**Keywords:** BRAF; MAPK; pan-cancer; precision oncology; genomics

**Received:** July 01, 2024

**Accepted:** July 07, 2024

**Published:** July 16, 2024

**Copyright:** © 2024 Toye et al. This is an open access article distributed under the terms of the [Creative Commons Attribution License](#) (CC BY 4.0), which permits unrestricted use, distribution, and reproduction in any medium, provided the original author and source are credited.

### ABSTRACT

**Activating mutations in the mitogen-activated protein kinase (MAPK) pathway represent driver alterations governing tumorigenesis, metastasis, and therapy resistance. MAPK activation predominantly occurs through genomic alterations in RAS and BRAF. BRAF is an effector kinase that functions downstream of RAS and propagates this oncogenic activity through MEK and ERK. Across cancers, BRAF alterations include gain-of-function mutations, copy-number alterations, and structural rearrangements. In cancer patients, BRAF-targeting precision therapeutics are effective against Class I BRAF alterations (p.V600 hotspot mutations) in tumors such as melanomas, thyroid cancers, and colorectal cancers. However, numerous non-Class I BRAF inhibitors are also in development and have been explored in some cancers. Here we discuss the diverse forms of BRAF alterations found in human cancers and the strategies to inhibit them in patients harboring cancers of distinct origins.**

### INTRODUCTION

#### BRAF is an effector of MAPK signaling

The mitogen-activated protein kinase (MAPK) pathway is a vital cell signaling pathway [1]. The MAPK pathway regulates cellular functions ranging from cell growth and proliferation to tissue repair and wound healing [2–4]. Functional members of this pathway are the cytoplasmic serine/threonine kinases *RAS*, *RAF*, *MEK*, and *ERK*. Canonical activation of receptor tyrosine kinases leads to *RAS*-GDP phosphorylation, creating activated *RAS*-GTP. This in turn phosphorylates *RAF*, which dimerizes and then phosphorylates *MEK1/2*. Phosphorylated *MEK1/2* then activates *ERK1/2*, which regulates cellular growth, proliferation, and cell death [5–7]. There are three distinct isoforms of the *RAF* proteins encoded by the *ARAF*, *BRAF*, and *RAF1* (also known as *CRAF*) genes [8]. Each of these isoforms contains the same conserved regions (CR): the *RAS*-binding domain (CR1), regulatory domain (CR2),

and functional kinase domain (CR3) [9]. Although all *RAF* kinases promote MAPK signaling, *BRAF* is the most consistently altered *RAF* family gene across human cancers.

#### BRAF in cancer

Due to these pro-growth and pro-survival functions, cancer cells can develop “oncogenic addiction” towards *BRAF*’s signaling activity [10, 11]. Initially characterized in melanomas, various groups including ours have identified activating *BRAF* alterations across multiple cancers [12–19]. Based on the American Association for Cancer Research’s (AACR) Genomics Evidence Neoplasia Information Exchange (GENIE, version 15.1) dataset, *BRAF* alterations are observed in several human malignancies, including 44% of thyroid cancers, 35% of melanomas, and 12% of colorectal cancers; with multiple other major cancer types exhibiting lower frequencies of *BRAF* alterations (Figure 1A). Consistent with these genomic observations,

abundant pre-clinical evidence across many malignancies indicates that *BRAF* alterations drive an increase in MAPK signaling and, thus, tumor growth in cancer cell lines and transgenic mouse models [20–22].

### Classes of *BRAF* alterations in cancer

Studies generally recognize three classes of activating *BRAF* alterations defined by their mechanisms of *RAS* dependency, dimerization status, and kinase activity [23]. Class I *BRAF* mutants involve missense mutations at valine 600 (p.V600), which lead to *RAS*-independent BRAF monomeric activation with strongly

elevated kinase activity [12, 24]. Class I alterations are the dominant form of *BRAF* alteration in melanomas, thyroid, colorectal, and ovarian cancers (Figure 1B). In these cancer types, tumors with Class I alterations can be treated with BRAF inhibitors or combinations of BRAF/MEK inhibitors. Class II *BRAF* alterations consist of non-p.V600 mutations and structural rearrangements that yield homodimers, that are also *RAS*-independent but have moderate-to-high kinase activity [25]. Class II alterations appear to be the predominant form of *BRAF* alteration in prostate, bladder, and non-small cell lung cancers. Class III *BRAF* alterations are also non-p.V600 mutants, however, they heterodimerize with ARAF or wild-type

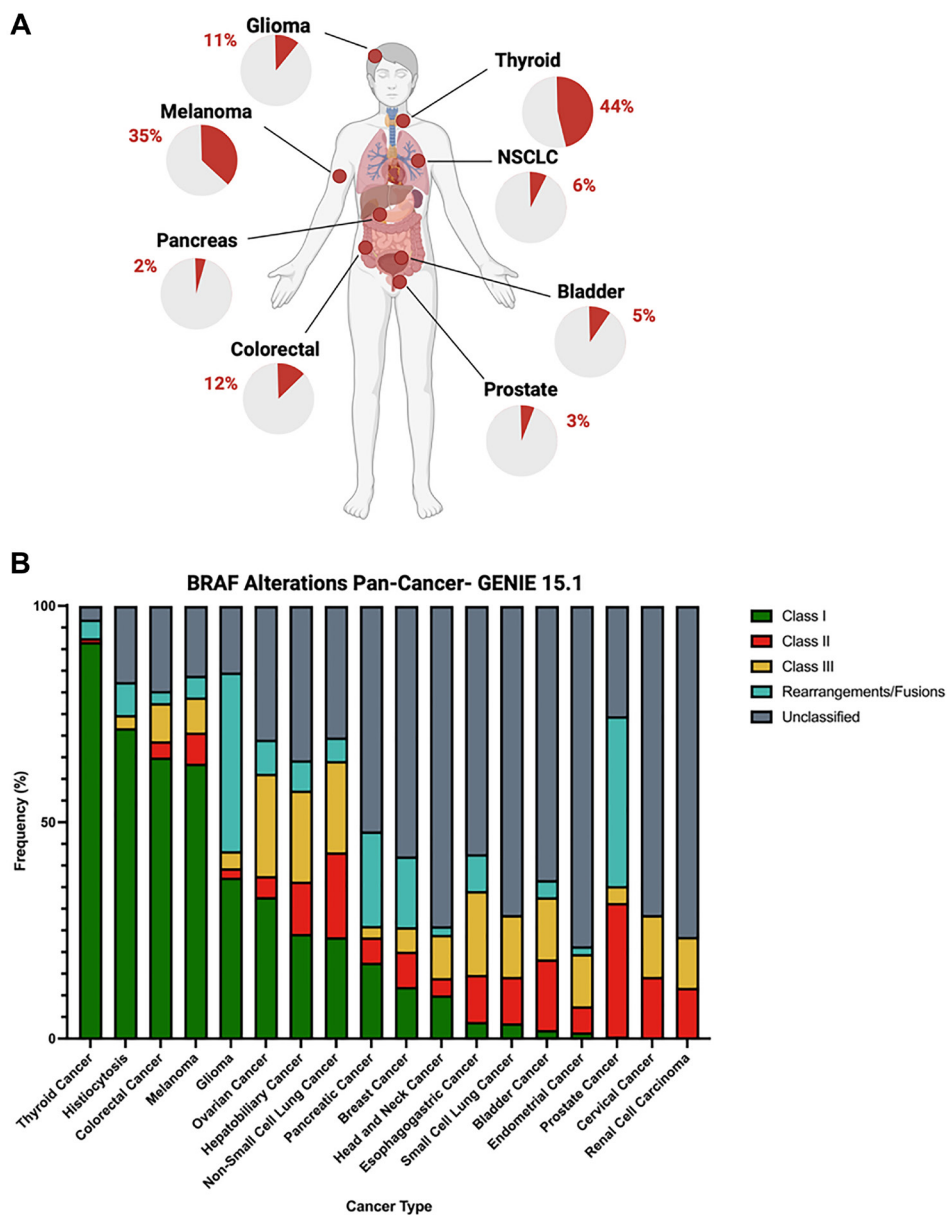

**Figure 1:** (A) *BRAF* alteration frequencies, according to GENIE 15.1, among select solid organ tumors (glioma, 11%; thyroid cancer, 44%; non-small cell lung cancer, 6%; bladder cancer, 5%; prostate cancer, 3%; colorectal cancer, 12%; pancreatic cancer, 2%; and melanoma, 35%). (B) Relative proportions of distinct classifications of *BRAF* alterations across multiple cancer types (green = Class I, red = Class II, yellow = Class III, teal = structural rearrangement, and gray = unclassified).

BRAF but are *RAS*-dependent and have low kinase activity [26]. Cervical cancer, hepatobiliary cancer, and non-small cell lung cancer harbor relatively high rates of Class III *BRAF* alterations. Due to the requisite upstream stimulus of mutant *RAS*, Class III mutants may be susceptible to *RAS*-specific targeted therapies [27].

### Evolution of BRAF inhibition in the clinic

Over the past 15 years, precision therapies targeting *BRAF* have been used to treat patients with metastatic melanomas. In 2010, Flaherty et al. showed an objective response in >80% of Class I-altered metastatic melanoma patients using PLX4032, later named vemurafenib [28]. In 2012, Hauschild et al. demonstrated a 70% reduction in the risk of death (HR = 0.30) in *BRAF* p.V600E-mutated metastatic melanoma patients treated with dabrafenib, compared to chemotherapy (dacarbazine) control [29]. These studies were foundational for establishing the utility of the Class I *BRAF* inhibitors, vemurafenib and dabrafenib. Flaherty et al. also indicated that metastatic melanomas resistant to *BRAF* inhibitors still require MAPK activity and that combined use of *BRAF* and *MEK* inhibitors demonstrated a significant increase in median progression-free survival (PFS) compared to *BRAF* monotherapy [30, 31]. In 2022, the FDA granted accelerated approval for this combination in all Class

I *BRAF*-mutant metastatic solid tumors [32]. In sum, inhibitors targeting Class I *BRAF* alterations represent one of the major successes in precision oncology to date (Figure 2).

In contrast, agents targeting Class II and III *BRAF* alterations have yet to achieve similar success. Mechanistically, Class II and III *BRAF* alterations are not susceptible to Class I inhibitors, which attenuate *BRAF* activity by binding monomeric *BRAF* and inducing dimerization. Paradoxically, these drugs enhance Class II and III altered *BRAF* signaling, in which dimerization promotes enhanced MAPK signaling and ultimately tumor growth [25, 33–35]. Recently, a new focus has been on developing paradox breakers and type II pan-*RAF* inhibitors that ablate the upregulated MAPK activity seen in Class II and III *BRAF*-altered cancers treated with currently FDA-approved *RAF* inhibitors. Results from the phase II FIREFLY-1 clinical trial assessing the type-II pan-*RAF* inhibitor tovorafenib showed high tolerability and strong efficacy in non-Class I *BRAF*-mutant pediatric low-grade gliomas (pLGG) harboring *BRAF* structural rearrangements [36]. Specifically, relapsed/refractory pLGG patients demonstrated an overall response rate of 67% and a median duration of response of 16.6 months, exceeding both the primary and secondary pre-specified endpoints. With these striking results, the FDA recently approved

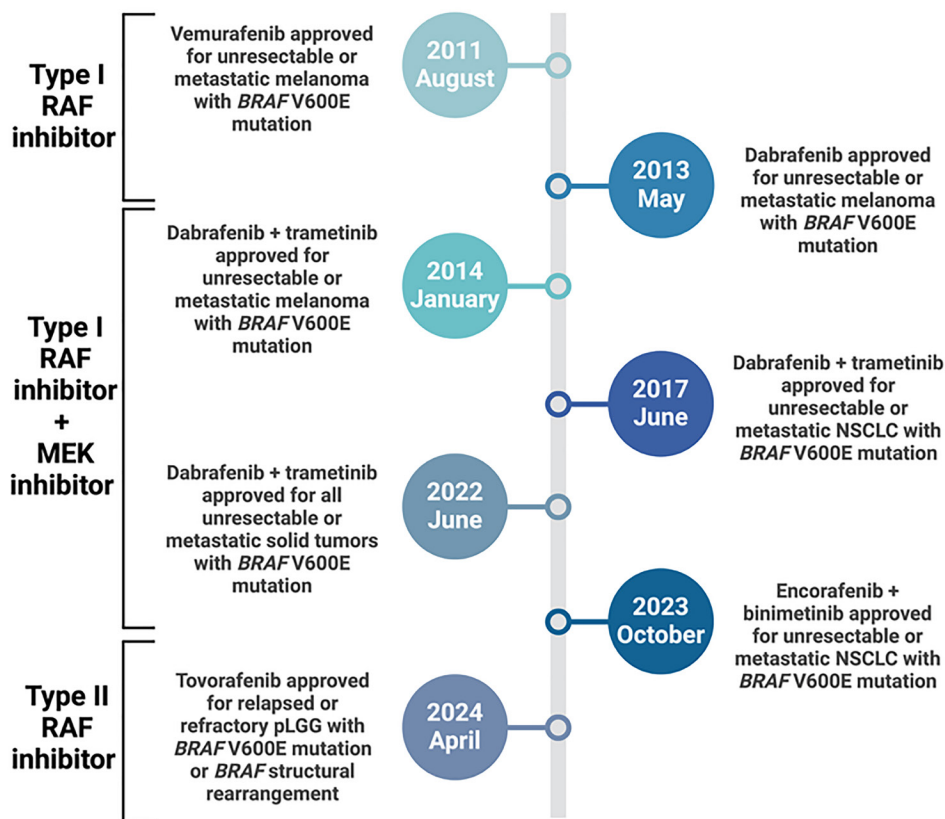

**Figure 2: Timeline showing major FDA approvals involving BRAF/MEK inhibitors.** pLGG = pediatric low-grade gliomas  
NSCLC = non small cell lung cancer.

tovorafenib for relapsed/refractory pLGG patients harboring *BRAF* structural rearrangements [37].

### **BRAF** structural rearrangements

Structural rearrangements of *BRAF* also represent a potentially actionable subgroup of *BRAF* alterations and are most prevalent in gliomas, prostate cancers and pancreatic cancers (Figure 1B). In one case study, a prostate cancer patient with an *SND1-BRAF* structural rearrangement who was refractory to standard therapies showed a strong clinical response to trametinib monotherapy, an FDA-approved MEK inhibitor [38].

These *BRAF* rearrangement events were also seen with some frequency at the prostate cancer level, as our group recently examined 15,864 prostate tissue biopsies and 7,566 liquid biopsies, where we showed that 46.7% of prostate cancer patients harboring *BRAF* alterations exhibited structural rearrangements [13].

In addition, certain structural rearrangements were exclusively found in specific cancer types, as is the case for *SLC45A3-BRAF* and *TMPRSS2-BRAF* structural rearrangements in prostate tumors and no other cancer types (Figure 3A). *TMPRSS2* and *SLC45A3* are generally expressed in the prostate epithelium and their expression is regulated by the lineage-specifying transcriptional

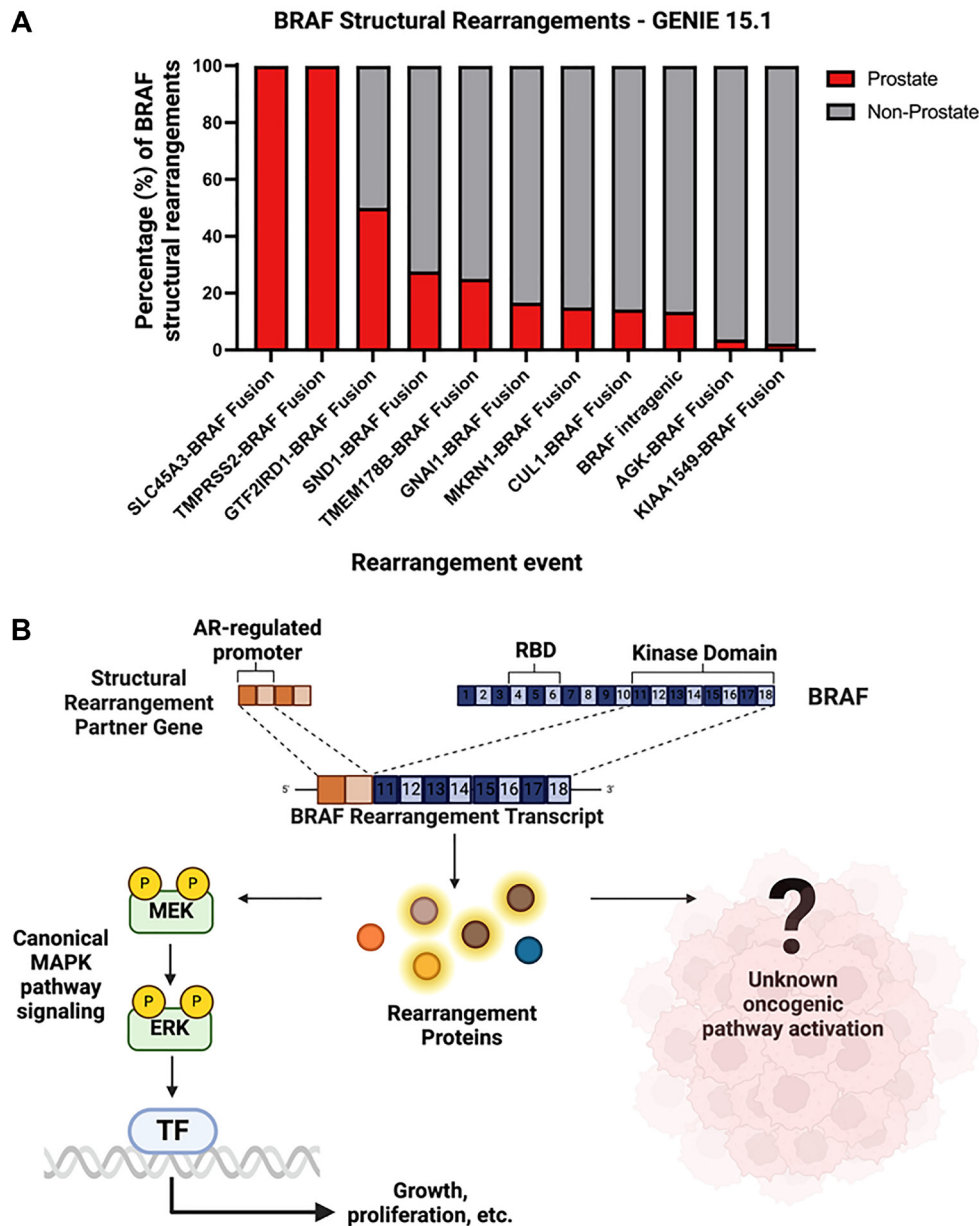

**Figure 3:** (A) Relative proportion of specific structural rearrangement *BRAF* events in prostate cancer versus all other cancer types (red = prostate cancer, gray = non-prostate cancer). (B) Mechanism depicting possible downstream effects of *BRAF* structural rearrangement events that yield a truncated *BRAF* transcript with a fully functional kinase domain.

activity of the androgen receptor (AR) [39]. In prostate cancers, *SLC45A3-BRAF* and *TMPRSS2-BRAF* structural rearrangements thus result in activated BRAF kinase activity under the control of AR (Figure 3B). This fusion-protein product would also be predicted to be independent of *RAS* activity due to loss of the 5' *RAS*-binding domain. Altogether, this represents another mechanism of BRAF activation in cancer, whereby BRAF kinase expression is driven by aberrant transcriptional activity. The efficacy of BRAF or MAPK inhibitors in such cancer patients requires further investigation in prospective studies.

## CONCLUSION

Class I BRAF inhibitors are one of the landmark achievements in precision oncology, as recently evidenced by the tissue-agnostic FDA approval of dabrafenib/trametinib in patients with metastatic *BRAF* p.V600E-mutant solid tumors. Although targeted therapies against Class II alterations, Class III mutations, and *BRAF* rearrangements are largely still in early development, the accelerated approval of tovorafenib for patients with relapsed/refractory *BRAF*-altered pediatric low-grade glioma underscores the therapeutic potential of this and other next-generation strategies to target aberrant MAPK signaling.

## AUTHOR CONTRIBUTIONS

Conception and design: All authors. Analysis and interpretation of data: Eamon Toye, Justin Hwang. Writing of the original manuscript draft: Eamon Toye. Review, revision, and approval of the manuscript: All authors.

## CONFLICTS OF INTEREST

A.C.R. reports personal fees from Exelixis, Inc. and Aveo, Inc. outside the submitted work. JH consults for Tempus and is a co-founder of EMRGNSE. E.S.A. reports grants and personal fees from Janssen, Sanofi, Bayer, Bristol Myers Squibb, Curium, MacroGenics, Merck, Pfizer, AstraZeneca, and Clovis; personal fees from Aadi Bioscience, Aikido Pharma, Astellas, Amgen, Blue Earth, Corcept Therapeutics, Exact Sciences, Hookipa Pharma, Invitae, Eli Lilly, Foundation Medicine, Menarini-Silicon Biosystems, Tango Therapeutics, Tempus and Z-alpha; grants from Novartis, Celgene, and Orion; and has a patent for an AR-V7 biomarker technology that has been licensed to Qiagen.

## FUNDING

This work is in part funded by the University of Minnesota CRTI Translational Working Group (TWG) Award to JH. E.S.A. is partially supported by NCI grant P30 CA077598 and DOD grant W81XWH-22-2-0025.

## REFERENCES

1. Widmann C, Gibson S, Jarpe MB, Johnson GL. Mitogen-activated protein kinase: conservation of a three-kinase module from yeast to human. *Physiol Rev.* 1999; 79:143–80. <https://doi.org/10.1152/physrev.1999.79.1.143>. [PubMed]
2. Voisin L, Saba-El-Leil MK, Julien C, Frémin C, Meloche S. Genetic demonstration of a redundant role of extracellular signal-regulated kinase 1 (ERK1) and ERK2 mitogen-activated protein kinases in promoting fibroblast proliferation. *Mol Cell Biol.* 2010; 30:2918–32. <https://doi.org/10.1128/MCB.00131-10>. [PubMed]
3. Drosten M, Dhawahir A, Sum EY, Urosevic J, Lechuga CG, Esteban LM, Castellano E, Guerra C, Santos E, Barbacid M. Genetic analysis of Ras signalling pathways in cell proliferation, migration and survival. *EMBO J.* 2010; 29:1091–104. <https://doi.org/10.1038/emboj.2010.7>. [PubMed]
4. Thuraingam T, Xu YZ, Eadie K, Heravi M, Guiot MC, Greemberg R, Gaestel M, Radzioch D. MAPKAPK-2 signaling is critical for cutaneous wound healing. *J Invest Dermatol.* 2010; 130:278–86. <https://doi.org/10.1038/jid.2009.209>. [PubMed]
5. Cargnello M, Roux PP. Activation and function of the MAPKs and their substrates, the MAPK-activated protein kinases. *Microbiol Mol Biol Rev.* 2011; 75:50–83. <https://doi.org/10.1128/MMBR.00031-10>. [PubMed]
6. Lewis TS, Shapiro PS, Ahn NG. Signal transduction through MAP kinase cascades. *Adv Cancer Res.* 1998; 74:49–139. [https://doi.org/10.1016/s0065-230x\(08\)60765-4](https://doi.org/10.1016/s0065-230x(08)60765-4). [PubMed]
7. Pearson G, Robinson F, Beers Gibson T, Xu BE, Karandikar M, Berman K, Cobb MH. Mitogen-activated protein (MAP) kinase pathways: regulation and physiological functions. *Endocr Rev.* 2001; 22:153–83. <https://doi.org/10.1210/edrv.22.2.0428>. [PubMed]
8. Matallanas D, Birtwistle M, Romano D, Zebisch A, Rauch J, von Kriegsheim A, Kolch W. Raf family kinases: old dogs have learned new tricks. *Genes Cancer.* 2011; 2:232–60. <https://doi.org/10.1177/1947601911407323>. [PubMed]
9. Park E, Rawson S, Li K, Kim BW, Ficarro SB, Pino GG, Sharif H, Marto JA, Jeon H, Eck MJ. Architecture of autoinhibited and active BRAF-MEK1-14-3-3 complexes. *Nature.* 2019; 575:545–50. <https://doi.org/10.1038/s41586-019-1660-y>. [PubMed]
10. Luo J, Solimini NL, Elledge SJ. Principles of cancer therapy: oncogene and non-oncogene addiction. *Cell.* 2009; 136:823–37. <https://doi.org/10.1016/j.cell.2009.02.024>. [PubMed]
11. Blume-Jensen P, Hunter T. Oncogenic kinase signalling. *Nature.* 2001; 411:355–65. <https://doi.org/10.1038/35077225>. [PubMed]
12. Davies H, Bignell GR, Cox C, Stephens P, Edkins S, Clegg S, Teague J, Woffendin H, Garnett MJ, Bottomley W, Davis N, Dicks E, Ewing R, et al. Mutations of the BRAF gene in human cancer. *Nature.* 2002; 417:949–54. <https://doi.org/10.1038/nature00766>. [PubMed]

13. Chehrazi-Raffle A, Tukachinsky H, Toye E, Sivakumar S, Schrock AB, Bergom HE, Ebrahimi H, Pal S, Dorff T, Agarwal N, Mahal BA, Oxnard GR, Hwang J, Antonarakis ES. Unique Spectrum of Activating BRAF Alterations in Prostate Cancer. *Clin Cancer Res.* 2023; 29:3948–57. <https://doi.org/10.1158/1078-0432.CCR-23-1393>. [PubMed]
14. Kebebew E, Weng J, Bauer J, Ranvier G, Clark OH, Duh QY, Shibru D, Bastian B, Griffin A. The prevalence and prognostic value of BRAF mutation in thyroid cancer. *Ann Surg.* 2007; 246:466–70. <https://doi.org/10.1097/SLA.0b013e318148563d>. [PubMed]
15. Tejpar S, Bertagnolli M, Bosman F, Lenz HJ, Garraway L, Waldman F, Warren R, Bild A, Collins-Brennan D, Hahn H, Harkin DP, Kennedy R, Ilyas M, et al. Prognostic and predictive biomarkers in resected colon cancer: current status and future perspectives for integrating genomics into biomarker discovery. *Oncologist.* 2010; 15:390–404. <https://doi.org/10.1634/theoncologist.2009-0233>. [PubMed]
16. Ikenoue T, Hikiba Y, Kanai F, Tanaka Y, Imamura J, Imamura T, Ohta M, Ijichi H, Tateishi K, Kawakami T, Aragaki J, Matsumura M, Kawabe T, Omata M. Functional analysis of mutations within the kinase activation segment of B-Raf in human colorectal tumors. *Cancer Res.* 2003; 63:8132–37. [PubMed]
17. Naoki K, Chen TH, Richards WG, Sugarbaker DJ, Meyerson M. Missense mutations of the BRAF gene in human lung adenocarcinoma. *Cancer Res.* 2002; 62:7001–3. [PubMed]
18. Sadlecki P, Walentowicz P, Bodnar M, Marszalek A, Grabiec M, Walentowicz-Sadlecka M. Determination of BRAF V600E (VE1) protein expression and BRAF gene mutation status in codon 600 in borderline and low-grade ovarian cancers. *Tumour Biol.* 2017; 39:1010428317706230. <https://doi.org/10.1177/1010428317706230>. [PubMed]
19. Andrulis M, Lehnert N, Capper D, Penzel R, Heining C, Huellein J, Zenz T, von Deimling A, Schirmacher P, Ho AD, Goldschmidt H, Neben K, Raab MS. Targeting the BRAF V600E mutation in multiple myeloma. *Cancer Discov.* 2013; 3:862–69. <https://doi.org/10.1158/2159-8290.CD-13-0014>. [PubMed]
20. Pritchard C, Carragher L, Aldridge V, Giblett S, Jin H, Foster C, Andreadi C, Kamata T. Mouse models for BRAF-induced cancers. *Biochem Soc Trans.* 2007; 35:1329–33. <https://doi.org/10.1042/BST0351329>. [PubMed]
21. Wan PT, Garnett MJ, Roe SM, Lee S, Niculescu-Duvaz D, Good VM, Jones CM, Marshall CJ, Springer CJ, Barford D, Marais R, and Cancer Genome Project. Mechanism of activation of the RAF-ERK signaling pathway by oncogenic mutations of B-RAF. *Cell.* 2004; 116:855–67. [https://doi.org/10.1016/s0092-8674\(04\)00215-6](https://doi.org/10.1016/s0092-8674(04)00215-6). [PubMed]
22. Haling JR, Sudhamsu J, Yen I, Sideris S, Sandoval W, Phung W, Bravo BJ, Giannetti AM, Peck A, Masselot A, Morales T, Smith D, Brandhuber BJ, et al. Structure of the BRAF-MEK complex reveals a kinase activity independent role for BRAF in MAPK signaling. *Cancer Cell.* 2014; 26:402–13. <https://doi.org/10.1016/j.ccr.2014.07.007>. [PubMed]
23. Śmiech M, Leszczyński P, Kono H, Wardell C, Taniguchi H. Emerging *BRAF* Mutations in Cancer Progression and Their Possible Effects on Transcriptional Networks. *Genes (Basel).* 2020; 11:1342. <https://doi.org/10.3390/genes11111342>. [PubMed]
24. Pratilas CA, Taylor BS, Ye Q, Viale A, Sander C, Solit DB, Rosen N. (V600E)BRAF is associated with disabled feedback inhibition of RAF-MEK signaling and elevated transcriptional output of the pathway. *Proc Natl Acad Sci U S A.* 2009; 106:4519–24. <https://doi.org/10.1073/pnas.0900780106>. [PubMed]
25. Yao Z, Torres NM, Tao A, Gao Y, Luo L, Li Q, de Stanchina E, Abdel-Wahab O, Solit DB, Poulikakos PI, Rosen N. BRAF Mutants Evade ERK-Dependent Feedback by Different Mechanisms that Determine Their Sensitivity to Pharmacologic Inhibition. *Cancer Cell.* 2015; 28:370–83. <https://doi.org/10.1016/j.ccell.2015.08.001>. [PubMed]
26. Heidorn SJ, Milagre C, Whittaker S, Noury A, Niculescu-Duvas I, Dhomen N, Hussain J, Reis-Filho JS, Springer CJ, Pritchard C, Marais R. Kinase-dead BRAF and oncogenic RAS cooperate to drive tumor progression through CRAF. *Cell.* 2010; 140:209–21. <https://doi.org/10.1016/j.cell.2009.12.040>. [PubMed]
27. Yao Z, Yaeger R, Rodrik-Outmezguine VS, Tao A, Torres NM, Chang MT, Drosten M, Zhao H, Cecchi F, Hembrough T, Michels J, Baumert H, Miles L, et al. Tumours with class 3 BRAF mutants are sensitive to the inhibition of activated RAS. *Nature.* 2017; 548:234–38. <https://doi.org/10.1038/nature23291>. [PubMed]
28. Flaherty KT, Puzanov I, Kim KB, Ribas A, McArthur GA, Sosman JA, O'Dwyer PJ, Lee RJ, Grippo JF, Nolop K, Chapman PB. Inhibition of mutated, activated BRAF in metastatic melanoma. *N Engl J Med.* 2010; 363:809–19. <https://doi.org/10.1056/NEJMoa1002011>. [PubMed]
29. Hauschild A, Grob JJ, Demidov LV, Jouary T, Gutzmer R, Millward M, Rutkowski P, Blank CU, Miller WH Jr, Kaempgen E, Martín-Algarra S, Karaszewska B, Mauch C, et al. Dabrafenib in BRAF-mutated metastatic melanoma: a multicentre, open-label, phase 3 randomised controlled trial. *Lancet.* 2012; 380:358–65. [https://doi.org/10.1016/S0140-6736\(12\)60868-X](https://doi.org/10.1016/S0140-6736(12)60868-X). [PubMed]
30. Flaherty KT, Robert C, Hersey P, Nathan P, Garbe C, Milhem M, Demidov LV, Hassel JC, Rutkowski P, Mohr P, Dummer R, Trefzer U, Larkin JM, et al, and METRIC Study Group. Improved survival with MEK inhibition in BRAF-mutated melanoma. *N Engl J Med.* 2012; 367:107–14. <https://doi.org/10.1056/nejmoa1203421>. [PubMed]
31. Flaherty KT, Infante JR, Daud A, Gonzalez R, Kefford RF, Sosman J, Hamid O, Schuchter L, Cebon J, Ibrahim N, Kudchadkar R, Burris HA 3rd, Falchook G, et al. Combined BRAF and MEK inhibition in melanoma with BRAF V600 mutations. *N Engl J Med.* 2012; 367:1694–703. <https://doi.org/10.1056/NEJMoa1210093>. [PubMed]

32. Center for Drug Evaluation and Research. FDA grants accelerated approval to dabrafenib in combination with trametinib for unresectable or metastatic solid tumors with BRAF V600E mutation. FDA. 2022. Available from <https://www.fda.gov/drugs/resources-information-approved-drugs/fda-grants-accelerated-approval-dabrafenib-combination-trametinib-unresectable-or-metastatic-solid>.
33. Poulidakos PI, Zhang C, Bollag G, Shokat KM, Rosen N. RAF inhibitors transactivate RAF dimers and ERK signalling in cells with wild-type BRAF. *Nature*. 2010; 464:427–30. <https://doi.org/10.1038/nature08902>. [PubMed]
34. Holderfield M, Nagel TE, Stuart DD. Mechanism and consequences of RAF kinase activation by small-molecule inhibitors. *Br J Cancer*. 2014; 111:640–45. <https://doi.org/10.1038/bjc.2014.139>. [PubMed]
35. Jin T, Lavoie H, Sahmi M, David M, Hilt C, Hammell A, Therrien M. RAF inhibitors promote RAS-RAF interaction by allosterically disrupting RAF autoinhibition. *Nat Commun*. 2017; 8:1211. <https://doi.org/10.1038/s41467-017-01274-0>. [PubMed]
36. Kilburn LB, Khuong-Quang DA, Hansford JR, Landi D, van der Lugt J, Leary SES, Driever PH, Bailey S, Perreault S, McCowage G, Waanders AJ, Ziegler DS, Witt O, et al. The type II RAF inhibitor tovorafenib in relapsed/refractory pediatric low-grade glioma: the phase 2 FIREFLY-1 trial. *Nat Med*. 2024; 30:207–17. <https://doi.org/10.1038/s41591-023-02668-y>. [PubMed]
37. Center for Drug Evaluation and Research. FDA grants accelerated approval to tovorafenib for patients with relapsed or refractory BRAF-altered pediatric low-grade glioma. FDA. 2024. Available from <https://www.fda.gov/drugs/resources-information-approved-drugs/fda-grants-accelerated-approval-tovorafenib-patients-relapsed-or-refractory-braf-altered-pediatric>.
38. Fenor MD, Ruiz-Llorente S, Rodríguez-Moreno JF, Caleiras E, Torrego JC, Sevillano-Fernández E, Navarro P, Yagüe-Fernández M, Amarilla-Quintana S, Barquín A, García-Donas J. MEK inhibitor sensitivity in BRAF fusion-driven prostate cancer. *Clin Transl Oncol*. 2022; 24:2432–40. <https://doi.org/10.1007/s12094-022-02916-6>. [PubMed]
39. Jin HJ, Kim J, Yu J. Androgen receptor genomic regulation. *Transl Androl Urol*. 2013; 2:157–77. <https://doi.org/10.3978/j.issn.2223-4683.2013.09.01>. [PubMed]
